# Supplementary material for: Polymorphism in ADAM33 gene associated with asthmatics in West Bengal, India - An investigation by in-silico analysis
Source: PubMed Central journal article supplement — World Allergy Organ J. 2023 Nov 8;16(11):100834. doi: 10.1016/j.waojou.2023.100834 (PMC10663682; doi:10.1016/j.waojou.2023.100834), 2023-11-08
Supplement: mmc1.pdf [file mmc1.pdf]

**Supplemental Table 1: Cellular localization and function of proteins associated with ADAM33**

| Proteins                                       | Cellular localization                | Role in asthma                                                                                                                                    | References                  |
|------------------------------------------------|--------------------------------------|---------------------------------------------------------------------------------------------------------------------------------------------------|-----------------------------|
| PACSIN-2                                       | Cytoplasmic                          | Involved in linking the actin cytoskeleton                                                                                                        | Dumont et al., 2022 [1]     |
| CDH 11<br>(CADHERIN 11)                        | Integral membrane protein            | Type 2 classical cadherin protein associated with airway remodelling                                                                              | Chen et al., 2021[2]        |
| PPFIA1                                         | Cytoplasmic                          | Associated with regulation of focal adhesions                                                                                                     | Serra-Pagès et al., 1995[3] |
| FCER1A                                         | Membrane protein                     | It is an initiator of allergic response regulates histamine is released.                                                                          | Weidinger et al., 2008[4]   |
| PHF11<br>(PHD finger protein 11)               | Cytoplasmic and Nuclear localization | Asthma candidate gene. Positive regulator of Th1-type cytokine gene expression.                                                                   | Clarke et al., 2008[5]      |
| NPSR1<br>(Neuropeptide S receptor 1)           | Membrane protein.                    | G-protein coupled receptor associated with Neuropeptide S. Regulate intracellular Ca <sup>2+</sup> storage, associated with asthma.               | Vendelin et al., 2005[6]    |
| ORMDL-3<br>(ORMDL sphingolipid biosynthesis 3) | Endoplasmic reticulum membrane       | Negative regulator of sphingolipid synthesis may indirectly regulate ER mediated Ca <sup>2+</sup> signalling.                                     | Recasens et al., 2010[7]    |
| DPP 10<br>(Dipeptidyl peptidase like 10)       | Single pass type 2 membrane protein. | Mutation of this gene have been associated with asthma. Human airway epithelial cells with knockdown of DPP10 exhibit altered cytokine responses. | Zhang et al., 2018[8]       |
| GSDMB<br>(GASDERMIN B)                         | Membrane protein                     | Airway hyper responsiveness and remodelling. Associated with epithelial cell pyroptosis.                                                          | Panganiban et al., 2018[9]  |
| FCER1A                                         | Membrane protein                     | Binds to the Fc region of immunoglobulin, accountable for allergic reaction.                                                                      | Sanak et al., 2009[10]      |
| WASL                                           | Cytoplasmic protein                  | involved in actin nucleation by boosting ARP2/3 complex                                                                                           | May RC, 2001[11]            |

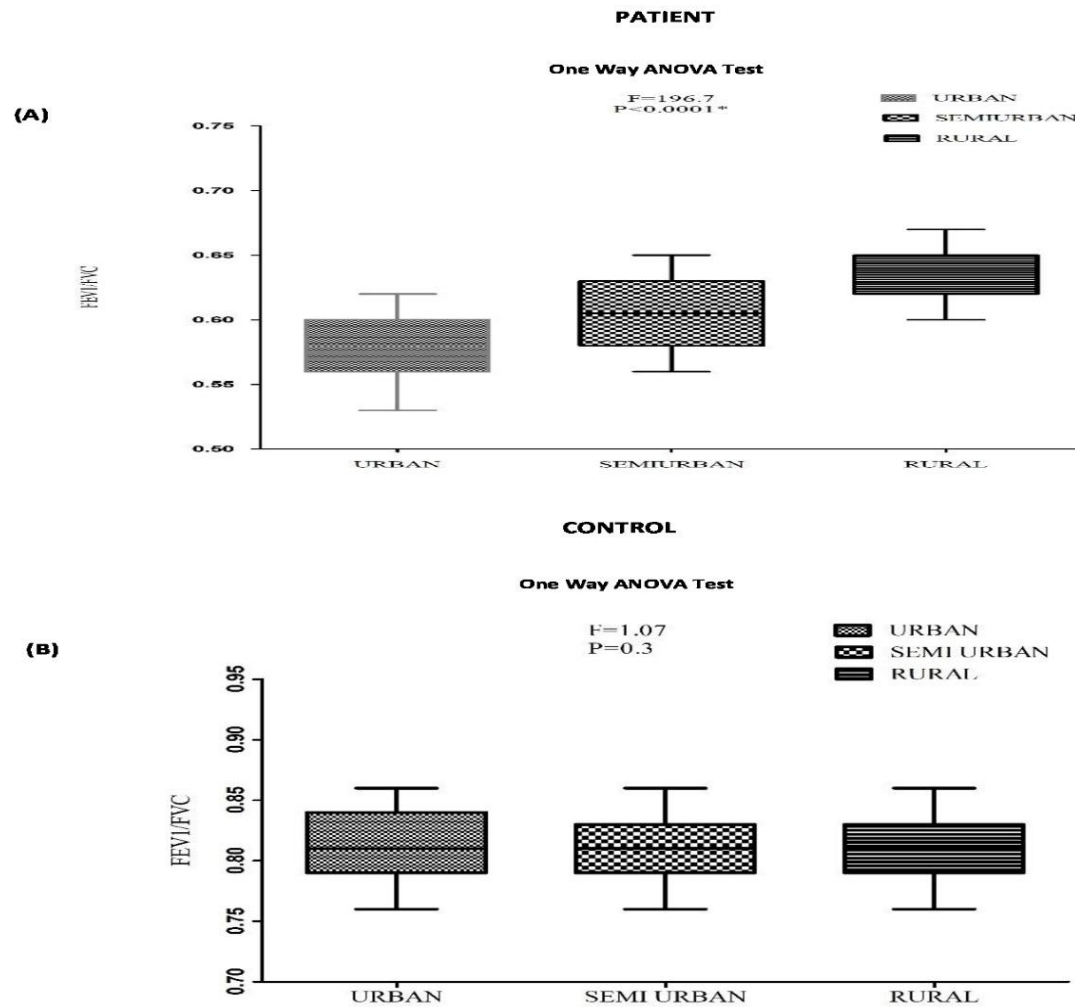

**Supplemental Figure 1:** Level of FEV<sub>1</sub>/FVC ratio in (A) asthmatic patients and (B) controls residing in different habitats. One Way ANOVA test showed a significant difference in FEV<sub>1</sub>/FVC ratio in patients residing in different habitats (urban, semiurban and rural). (\*P value significant).

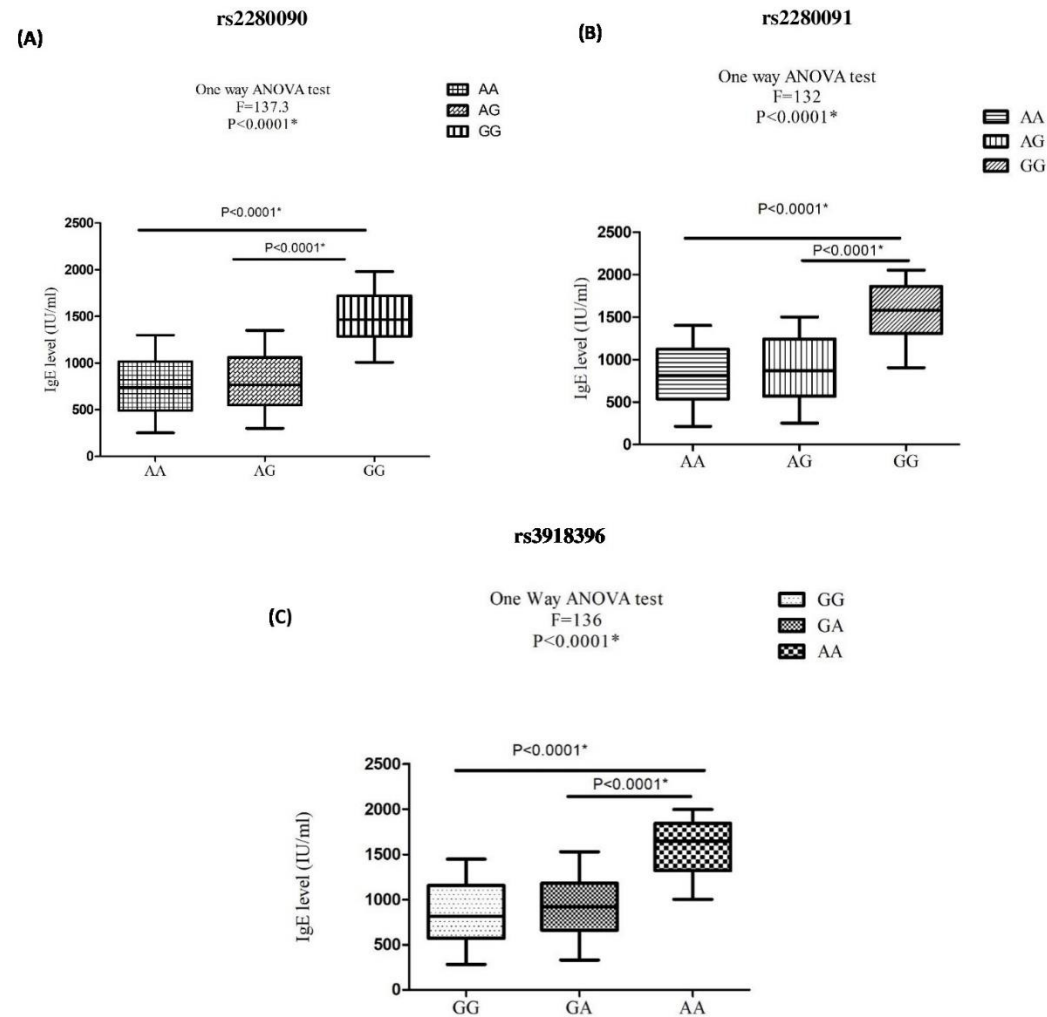

**Supplemental Figure 2:** IgE levels (IU/ml) in asthmatic patients bearing different polymorphic genotypes of ADAM33 (A) rs2280090

(B) rs2280091 (C) rs3918396 polymorphisms. One-Way ANOVA test showed that patients bearing risk genotype showed highest IgE level than heterozygous and major genotype bearers in all three polymorphisms (\*P value significant).

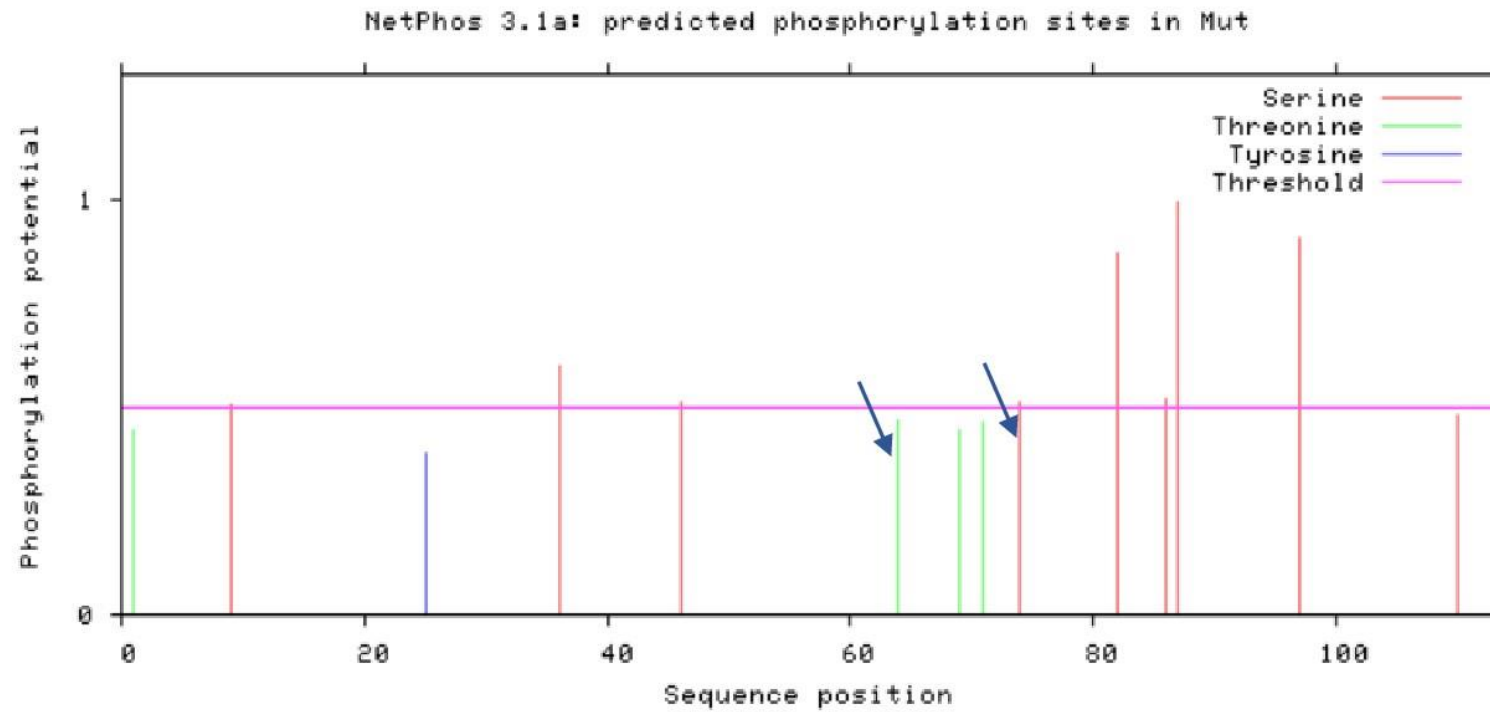

**Supplemental Figure 3:** Predicted phosphorylated amino acids. The amino acids at the transmembrane and cytoplasmic domain predicted to be phosphorylated. First amino acid at the transmembrane domain is numbered as amino acid number 1. Met764Thr and Pro774Ser are denoted with blue arrows.

## References

1. Dumont V, Lehtonen S. PACSIN proteins in vivo: Roles in development and physiology. *Acta Physiol (Oxf)*. 2022 Mar; 234(3): e13783. doi: 10.1111/apha.13783.
2. Chen X, Xiang H, Yu S, Lu Y, Wu T. Research progress in the role and mechanism of Cadherin-11 in different diseases. *J Cancer*. 2021 Jan 1; 12(4): 1190-99. doi: 10.7150/jca.52720.
3. Serra-Pagès C, Kedersha NL, Fazikas L, Medley Q, Debant A, Streuli M. The LAR transmembrane protein tyrosine phosphatase and a coiled-coil LAR-interacting protein co-localize at focal adhesions. *EMBO J*. 1995 Jun 15; 14(12): 2827-38. doi: 10.1002/j.1460-2075.1995.tb07282.x.
4. Weidinger S, Gieger C, Rodriguez E, Baurecht H, Mempel M, Klopp N, et al. Genome-wide scan on total serum IgE levels identifies FCER1A as novel susceptibility locus. *PLoS Genet*. 2008 Aug; 4(8): e1000166. doi:10.1371/journal.pgen.1000166.
5. Clarke E, Rahman N, Page N, Rolph MS, Stewart GJ, Jones GJ. Functional characterization of the atopy-associated gene PHF11. *J Allergy Clin Immunol*. 2008 May; 121(5): 1148-54.e3. doi: 10.1016/j.jaci.2008.02.028.
6. Vendelin J, Pulkkinen V, Rehn M, Pirskanen A, Räisänen-Sokolowski A, Laitinen A, et al. Characterization of GPRA, a novel G protein-coupled receptor related to asthma. *Am J Respir Cell Mol Biol*. 2005 Sep; 33(3): 262-70. doi: 10.1165/rcmb.2004-0405OC.
7. Cantero-Recasens G, Fandos C, Rubio-Moscardo F, Valverde MA, Vicente R. The asthma-associated ORMDL3 gene product regulates endoplasmic reticulum-mediated calcium signalling and cellular stress. *Hum Mol Genet*. 2010 Jan 1; 19(1): 111-21. doi: 10.1093/hmg/ddp471.

- 8.** Zhang Y, Poobalasingam T, Yates LL, Walker SA, Taylor MS, Chessum L, et al. Manipulation of dipeptidyl peptidase 10 in mouse and human *in vivo* and *in vitro* models indicates a protective role in asthma. *Dis Model Mech*. 2018 Jan 29; 11(1): dmm031369. doi: 10.1242/dmm.031369.
- 9.** Panganiban RA, Sun M, Dahlin A, Park HR, Kan M, Himes BE, et al. A functional splice variant associated with decreased asthma risk abolishes the ability of gasdermin B to induce epithelial cell pyroptosis. *J Allergy Clin Immunol*. 2018 Nov; 142(5): 1469-78.e2. doi: 10.1016/j.jaci.2017.11.040.
- 10.** Potaczek DP, Nishiyama C, Sanak M, Szczeklik A, Okumura K. Genetic variability of the high-affinity IgE receptor alpha-subunit (FcepsilonRIalpha). *Immunol Res*. 2009; 45(1): 75-84.doi:10.1007/s12026-008-8042-0.
- 11.** May RC. The Arp2/3 complex: a central regulator of the actin cytoskeleton. *Cell Mol Life Sci*. 2001 Oct;58(11):1607-26. doi: 10.1007/PL00000800.
